# Supplementary material for: The Effect of an Essential Oil Blend on Growth Performance, Intestinal Health, and Microbiota in Early-Weaned Piglets
Source: MDPI journal article supplement (doi:10.3390/nu15020450), 2023-01-14
Supplement: s1 [file s1]

## *Supplementary Material*

**Table S1.** Effect of different concentration of EO on growth performance in early-weaned piglets.

|                  | Control         | 0.005% EO        | 0.01% EO        | 0.02% EO         | 0.04% EO        | <i>P</i> -value |
|------------------|-----------------|------------------|-----------------|------------------|-----------------|-----------------|
| Body weight (kg) |                 |                  |                 |                  |                 |                 |
| Day 0            | 7.37 ± 0.21     | 7.67 ± 0.42      | 7.70 ± 0.39     | 7.70 ± 0.41      | 7.77 ± 0.45     | 0.952           |
| Day 14           | 9.74 ± 0.39     | 9.87 ± 0.83      | 10.06 ± 0.63    | 10.03 ± 0.62     | 10.43 ± 0.62    | 0.951           |
| Day 28           | 15.30 ± 0.62    | 16.36 ± 1.23     | 16.58 ± 1.44    | 16.55 ± 0.89     | 17.82 ± 1.12    | 0.623           |
| ADG (g/d)        |                 |                  |                 |                  |                 |                 |
| Day 0 to 14      | 169.35 ± 16.16  | 157.14 ± 32.98   | 168.45 ± 18.97  | 166.07 ± 16.1    | 190.18 ± 14.86  | 0.850           |
| Day 14 to 28     | 430.00 ± 11.59  | 463.69 ± 37.85   | 465.48 ± 60.77  | 465.77 ± 23.46   | 527.38 ± 39.88  | 0.559           |
| Day 0 to 28      | 283.33 ± 16.49  | 310.42 ± 32.52   | 316.96 ± 38.80  | 315.92 ± 17.75   | 358.78 ± 26.49  | 0.453           |
| ADFI (g/d)       |                 |                  |                 |                  |                 |                 |
| Day 0 to 14      | 373.39 ± 16.39a | 448.60 ± 24.8b   | 436.21 ± 8.759b | 435.14 ± 8.78b   | 488.54 ± 26.72b | 0.006           |
| Day 14 to 28     | 892.56 ± 38.65  | 937.97 ± 75.74   | 917.55 ± 79.88  | 973.08 ± 60.65   | 1092.76 ± 51.73 | 0.221           |
| Day 0 to 28      | 632.98 ± 25.11a | 693.28 ± 47.26ab | 639.91 ± 19.86a | 704.11 ± 34.41ab | 790.65 ± 37.94b | 0.029           |
| F/G              |                 |                  |                 |                  |                 |                 |
| Day 0 to 14      | 2.33 ± 0.27     | 2.61 ± 0.24      | 2.87 ± 0.29     | 2.72 ± 0.21      | 2.63 ± 0.21     | 0.623           |
| Day 14 to 28     | 2.13 ± 0.04     | 2.02 ± 0.02      | 1.90 ± 0.05     | 2.09 ± 0.06      | 2.10 ± 0.10     | 0.132           |
| Day 0 to 28      | 2.25 ± 0.08     | 2.30 ± 0.14      | 2.25 ± 0.15     | 2.24 ± 0.06      | 2.24 ± 0.12     | 0.996           |

Data are presented as means ± SEM (*n* = 6). EO: essential oil; ADG: average daily gain; ADFI: average daily feed intake; F/G: feed/gain ratio. Different letters (a, b) indicated significant differences (*P* < 0.05).

**Table S2.** Primer pairs used for the real-time quantitative polymerase chain reaction.

| Gene           | GeneBank no.   | Sequence (5'–3')       | Product length, bp | Reference |
|----------------|----------------|------------------------|--------------------|-----------|
| <i>β-actin</i> | XM_003124280.5 | F: CTGCGGCATCCACGAAACT | 147                | (64)      |

|             |                |                                                                               |     |      |
|-------------|----------------|-------------------------------------------------------------------------------|-----|------|
| <i>MUC1</i> | XM_021089728.1 | R: AGGGCCGTGATCTCCTTCTG<br>F: GGTACCCGGCTGGGGCATTG<br>R: GGTAGGCATCCCGGGTCGGA | 146 | (65) |
| <i>MUC2</i> | XM_021082584.1 | F: CTGCTCCGGGTCCTGTGGGA<br>R: CCCGCTGGCTGGTGCGATAC                            | 101 | (65) |
| <i>MUC4</i> | XM_021068274.1 | F: CATGGAGACCACCAGAGAAAC<br>R: GGTGTCCACTTGTGGAAGATAA                         | 83  |      |
| <i>ZO-1</i> | XM_021098827.1 | F: CCAACCATGTCTTGAAGCAGC<br>R: TGCAGGAGTGTGGTCTTCAC                           | 215 | (66) |
| claudin-1   | NM_001244539.1 | F: AAGGACAAAACCGTGTGGGA<br>R: CTCTCCCCACATTTCGAGATGATT                        | 247 | (67) |
| occludin-1  | NM_001163647.2 | F: CAGGTGCACCCTCCAGATTG<br>R: GGACTTTCAAGAGGCCTGGAT                           | 110 | (68) |

*MUC1*: mucin-1; *MUC2*: mucin-2; *MUC4*: mucin-4; *ZO-1*: zonula occludens-1.

**Table S3.** Effect of EO on piglet hematology index

|                          | Control      | 0.04% B      | <i>P</i> -value |
|--------------------------|--------------|--------------|-----------------|
| WBC (10 <sup>9</sup> /L) | 20.37 ± 1.93 | 19.14 ± 1.11 | 0.594           |
| Neu (10 <sup>9</sup> /L) | 5.29 ± 0.78  | 6.75 ± 1.78  | 0.937           |
| Lym (10 <sup>9</sup> /L) | 13.77 ± 1.44 | 11.31 ± 1.03 | 0.195           |
| Mon (10 <sup>9</sup> /L) | 1.10 ± 0.19  | 0.84 ± 0.11  | 0.280           |
| Eos (10 <sup>9</sup> /L) | 0.18 ± 0.05  | 0.22 ± 0.04  | 0.503           |
| Bas (10 <sup>9</sup> /L) | 0.02 ± 0.00  | 0.02 ± 0.00  | 0.713           |
| Neu (%)                  | 26.08 ± 2.88 | 33.67 ± 6.80 | 0.589           |
| Lym (%)                  | 67.63 ± 2.35 | 60.58 ± 6.56 | 0.699           |
| Mon (%)                  | 5.35 ± 0.64  | 4.48 ± 0.66  | 0.368           |
| Eos (%)                  | 0.80 ± 0.18  | 1.20 ± 0.29  | 0.268           |
| Bas (%)                  | 0.13 ± 0.05  | 0.07 ± 0.02  | 0.385           |

Data are presented as means ± SEM (*n* = 6). EO: essential oil; WBC: white blood cell count; Neu: neutrophil; Lym: lymphocyte; Mon: monocyte; Eos: eosinophil; Bas: basophil.
